# Supplementary material
Source: publisher site journal article supplement (https://www.spandidos-publications.com/6700/downloadSupplementary)

Figure S1. CT and pathological findings. (A) Image of CT scan showed no lymphadenopathy or mass lesion. Immunohistochemically, the lymphoid cells were negative for (B) CD5 and (C) CD30 (magnification, x20). The white arrows indicated areas that were typically negative for them. (D) Hemophagocytosis in the bone marrow smear, indicated by black arrow (May Grunwald-Giemsa staining; magnification, x40). (E) Vacuole-like inclusions of the lymphocyte in the bone marrow smear, indicated by black arrow (May Grunwald-Giemsa staining; magnification, x40). (F) No atypical lymphoid cells were found in the capillary vessels of the penile skin (hematoxylin and eosin staining; magnification, x10). CD, cluster of differentiation; CT, computed tomography.

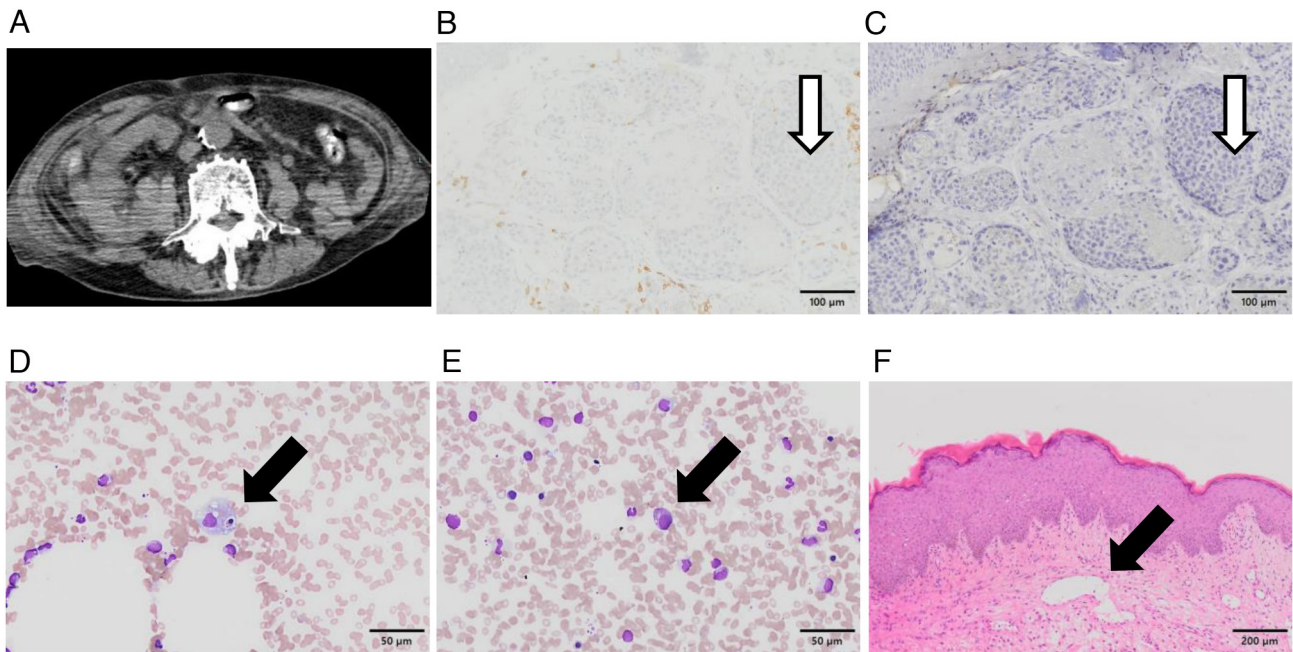

Supplement: Supplementary file 1 [file downloadSupplementary]
